# Supplementary figures and images for: Isoenergic modification of whey protein structure by denaturation and crosslinking using transglutaminase
Source: Royal Society of Chemistry journal article supplement (doi:10.1039/c7fo01451a), 2018-01-01

## Supplemental figures:

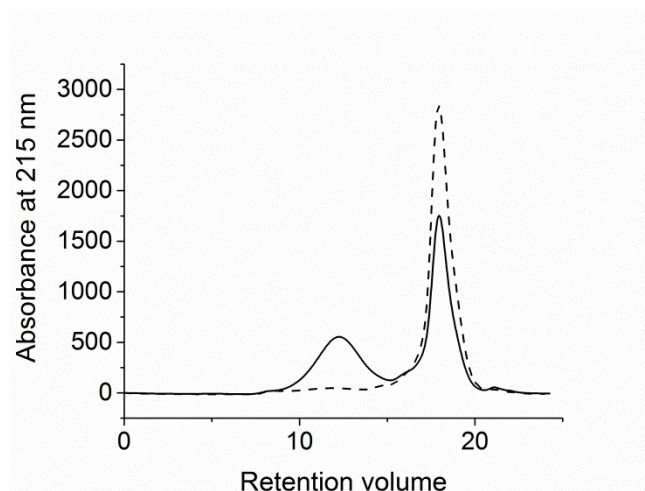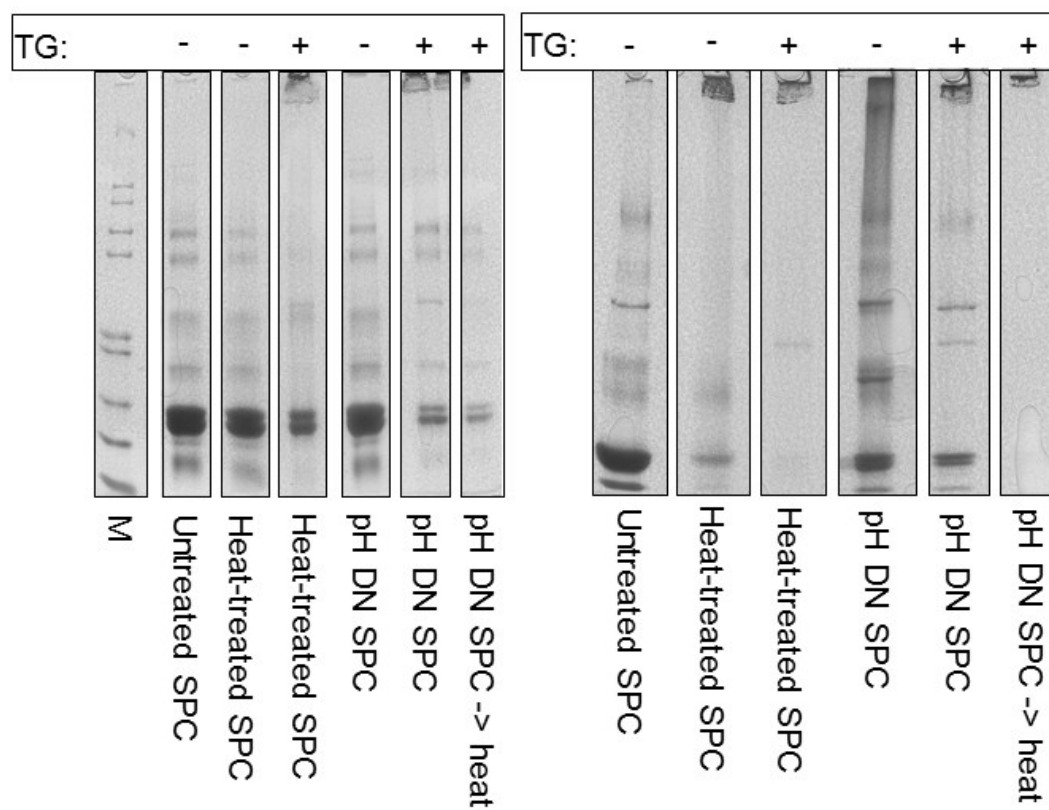

Supplement: c7fo01451a1.pdf [file c7fo01451a1.pdf]
